# Supplementary material for: Oleoylethanolamide Alleviates Hepatic Ischemia-Reperfusion Injury via Inhibiting Endoplasmic Reticulum Stress-Associated Apoptosis
Source: Hindawi journal article supplement (doi:10.1155/2022/2212996), 2022-03-21

# Supplementary Figure 1

A

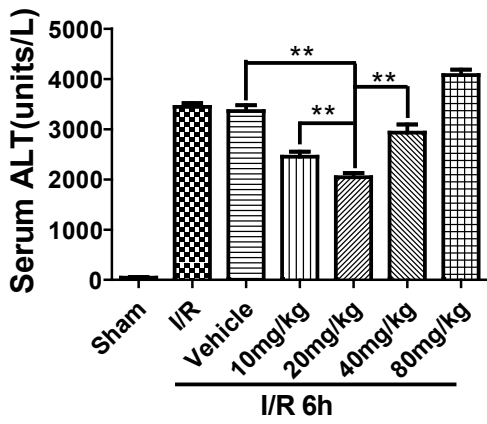

B

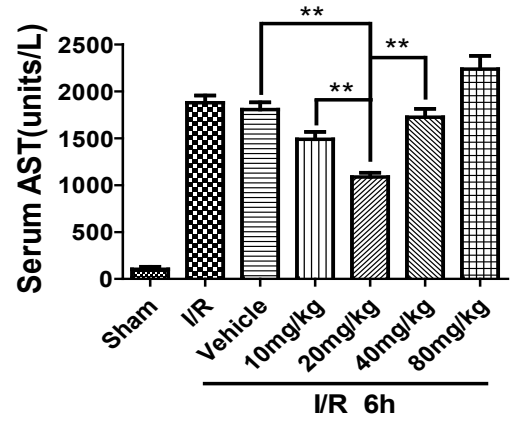

# Supplementary Figure 2

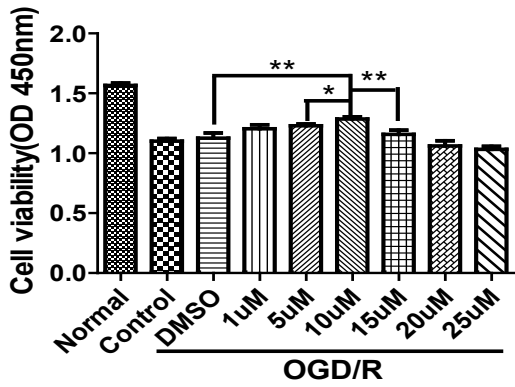

# Supplementary Figure 3

Primer sequences for qPCR

| Gene  | Primer pair                    |                                  |
|-------|--------------------------------|----------------------------------|
| Cpt1a | F:5'- TCCAGTTGGCTTATCGTGGTG-3' | R:5'- TCCAGAGTCCGATTGATTTTTGC-3' |
| Acox  | F:5'- ACTCGCAGCCAGCGTTATG-3'   | R:5'- AGGGTCAGCGATGCCAAAC-3'     |
| Fatp2 | F:5'- TTTCCGCCATCTACACAGTCC-3' | R:5'- CGTAGGTGAGAGTCTCGTCG-3'    |
| GADPH | F:5'- GGAGCGAGATCCCTCCAAAAT-3' | R:5'- GGCTGTTGTCATACTTCTCATGG-3' |

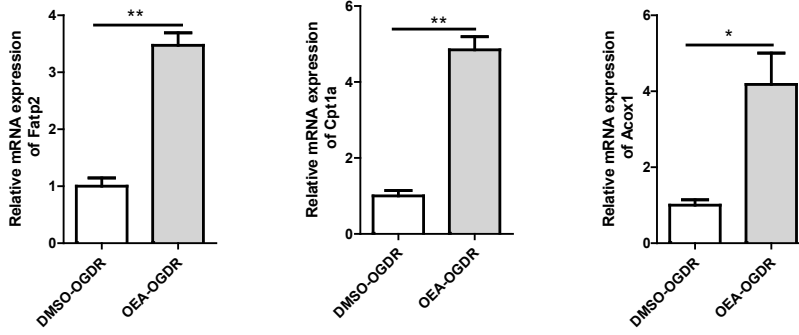

Supplement: f1 [file 2212996.f1.pdf]
